# Supplementary material
Source: Springer Nature journal article supplement (https://www.springermedizin.de/resource/supplementary/13014_2009_176_MOESM5_ESM.pdf/9633066)

(a)

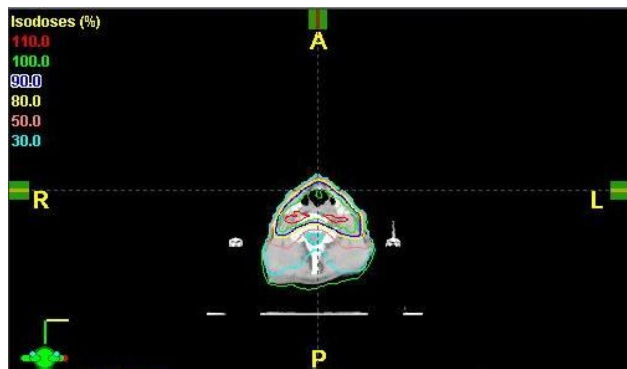

(b)

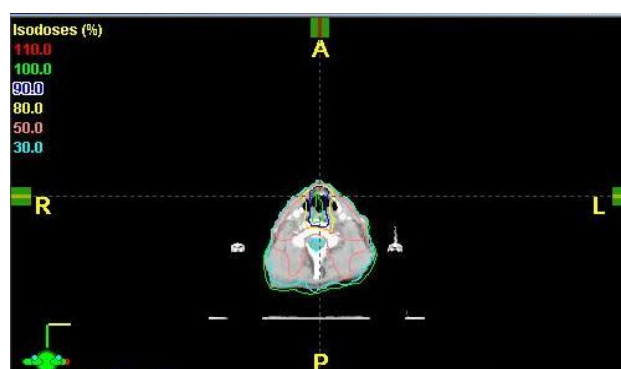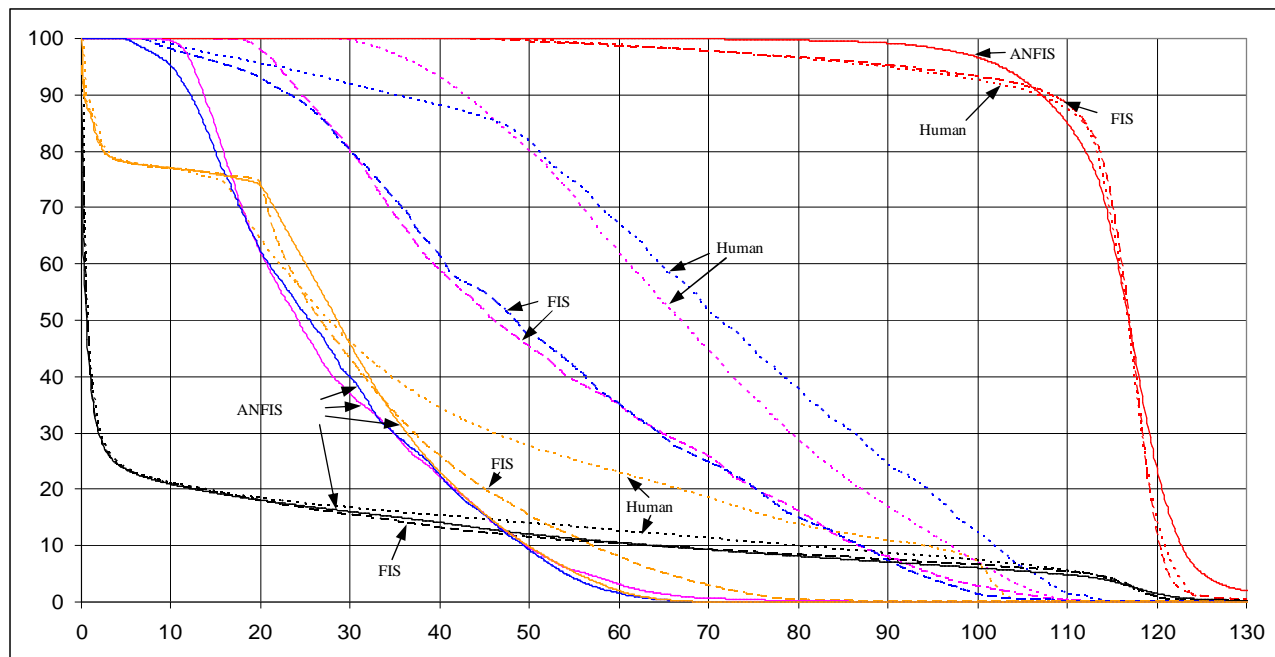

(c)

Supplement: MOESM5 [file 9633066]
